# Supplementary material for: An efficient blue phosphor with high thermal stability for lighting and optical pressure sensor applications
Source: Royal Society of Chemistry journal article supplement (doi:10.1039/d2qi00025c), 2022-01-01
Supplement: d2qi00025c1.pdf [file d2qi00025c1.pdf]

## Supporting Information:

### An efficient blue phosphor with high thermal stability for lighting and optical pressure sensor applications

Hang Chen,<sup>†</sup> Takatoshi Seto,<sup>†,\*</sup> Yuhua Wang<sup>†,\*</sup>

<sup>†</sup> National and Local Joint Engineering Laboratory for Optical Conversion Materials and Technology of National Development and Reform Commission, School of Materials and Energy Lanzhou University Lanzhou, 730000, China

\* Corresponding author, email: [seto@lzu.edu.cn](mailto:seto@lzu.edu.cn) and [wyh@lzu.edu.cn](mailto:wyh@lzu.edu.cn)

#### 1. Procedure of LED-device fabrication

The raw materials include Epoxy resin AB glue, 395 nm LED chip, red and green phosphor (CaAlSiN<sub>3</sub>: Eu<sup>2+</sup> and (BaSr)<sub>2</sub>SiO<sub>4</sub>: Eu<sup>2+</sup>) and as-prepared sample NCMPO:0.03Eu<sup>2+</sup>.

Firstly, we mixed the phosphors and ground thoroughly, the mass ratio of red, green and blue phosphor is about 1:1:1.2, and the total mass is 0.015g. There are slightly more blue phosphors due to the reabsorption of red and green phosphors in the blue region.

Secondly, about 0.02 g main agent A glue was weighted, and mix the weighted A glue and phosphor and stir evenly, then add 0.08g curing agent B glue, and stir for five minutes after adding B glue.

Finally, the defoamed mixture is dripped onto a 395 nm LED chip, and put the chip into the oven at 60 °C for 40 minutes and then at 135 °C for 90 minutes. After that, the white LED device was successfully fabricated.

**Table S1** The atomic coordinates of Na<sub>3</sub>CsMg<sub>7</sub>(PO<sub>4</sub>)<sub>6</sub> obtained from the Rietveld Refinement

| Atom | Position | x/a       | y/b       | z/c       |
|------|----------|-----------|-----------|-----------|
| Na1  | 8f       | 0.5521(6) | 0.2519(2) | 0.0216(6) |
| Na2  | 8f       | 0.2834(2) | 0.238(4)  | 0.0399(1) |
| Cs1  | 4e       | 0         | 0.2532(4) | 1/4       |
| Mg1  | 4e       | 1/2       | 0.1117(1) | 1/4       |
| Mg2  | 8f       | 0.1790(7) | 0.4850(9) | 0.1377(6) |

|     |    |           |            |            |
|-----|----|-----------|------------|------------|
| Mg3 | 8f | 0.2511(2) | -0.258(4)  | 0.0336(1)  |
| Mg4 | 4e | 1/2       | 0.3998(1)  | 1/4        |
| Mg5 | 8f | 0.3154(7) | 0.5260(7)  | 0.3672(5)  |
| P1  | 8f | 0.2932(4) | 0.2603(1)  | 0.2806(4)  |
| P2  | 8f | 0.4183(7) | 0.0077(7)  | 0.0806(5)  |
| P3  | 8f | 0.4025(6) | 0.4949(6)  | 0.0793(4)  |
| O1  | 8f | 0.5455(1) | 0.0158(2)  | 0.1535(9)  |
| O2  | 8f | 0.3237(1) | 0.4563(2)  | 0.1432(9)  |
| O3  | 8f | 0.5370(1) | 0.5099(1)  | 0.1411(8)  |
| O4  | 8f | 0.4154(9) | 0.2402(2)  | 0.2902(8)  |
| O5  | 8f | 0.3531(8) | 0.0589(1)  | 0.1316(7)  |
| O6  | 8f | 0.3802(9) | 0.3977(9)  | 0.0099(7)  |
| O7  | 8f | 0.4032(1) | 0.0624(1)  | -0.106(8)  |
| O8  | 8f | 0.3912(1) | -0.1212(1) | 0.05401(8) |
| O9  | 8f | 0.3853(1) | 0.6094(1)  | 0.0189(1)  |
| O10 | 8f | 0.2542(9) | 0.4154(1)  | 0.2783(8)  |
| O11 | 8f | 0.2885(1) | 0.1648(1)  | 0.3583(8)  |
| O12 | 8f | 0.2063(1) | 0.2028(2)  | 0.1769(8)  |

**Table S2** The bond lengths (Å) of Na<sub>3</sub>CsMg<sub>7</sub>(PO<sub>4</sub>)<sub>6</sub> obtained from the Rietveld Refinement

| Type of bond | Bond length | Type of bond | bond length |
|--------------|-------------|--------------|-------------|
| Cs(1)-O(8)   | 3.1130      | Mg(2)-O(10)  | 2.1454      |
| Cs(1)-O(8)   | 3.1130      | Mg(2)-O(11)  | 1.9644      |
| Cs(1)-O(3)   | 3.2381      | Mg(3)-O(9)   | 2.2590      |
| Cs(1)-O(3)   | 3.2381      | Mg(3)-O(9)   | 2.3001      |
| Cs(1)-O(12)  | 3.2876      | Mg(3)-O(8)   | 2.2085      |
| Cs(1)-O(12)  | 3.2876      | Mg(3)-O(8)   | 1.2325      |
| Cs(1)-O(1)   | 3.3406      | Mg(3)-O(11)  | 2.1013      |
| Cs(1)-O(1)   | 3.3406      | Mg(3)-O(11)  | 3.1053      |
|              |             | Mg(4)-O(4)   | 2.2346      |
| Na(1)-O(6)   | 2.3400      | Mg(4)-O(4)   | 2.2346      |
| Na(1)-O(8)   | 2.3593      | Mg(4)-O(2)   | 2.2898      |
| Na(1)-O(7)   | 2.4625      | Mg(4)-O(2)   | 2.2898      |
| Na(1)-O(9)   | 2.1375      | Mg(4)-O(3)   | 2.2566      |
| Na(1)-O(11)  | 2.5778      | Mg(4)-O(3)   | 2.2566      |
| Na(1)-O(4)   | 2.7146      | Mg(5)-O(12)  | 1.9946      |
| Na(2)-O(6)   | 2.2598      | Mg(5)-O(10)  | 1.7529      |
| Na(2)-O(6)   | 2.4055      | Mg(5)-O(6)   | 2.1971      |
| Na(2)-O(7)   | 2.7219      | Mg(5)-O(5)   | 2.1812      |
| Na(2)-O(5)   | 2.3456      | Mg(5)-O(3)   | 1.9408      |

|             |        |            |        |
|-------------|--------|------------|--------|
| Na(2)-O(7)  | 3.0936 | Mg(5)-O(9) | 2.6078 |
| Na(2)-O(2)  | 2.7662 | P(1)-O(12) | 1.6740 |
| Na(2)-O(12) | 2.6949 | P(1)-O(10) | 1.7292 |
| Na(2)-O(5)  | 3.3493 | P(1)-O(11) | 1.6001 |
| Mg(1)-O(4)  | 1.9917 | P(1)-O(4)  | 1.5191 |
| Mg(1)-O(4)  | 1.9917 | P(2)-O(8)  | 1.4428 |
| Mg(1)-O(1)  | 2.0767 | P(2)-O(7)  | 1.4737 |
| Mg(1)-O(1)  | 2.0767 | P(2)-O(5)  | 1.4595 |
| Mg(1)-O(5)  | 2.1233 | P(2)-O(1)  | 1.5742 |
| Mg(1)-O(5)  | 2.1233 | P(3)-O(9)  | 1.5063 |
| Mg(2)-O(7)  | 1.9058 | P(3)-O(6)  | 1.4439 |
| Mg(2)-O(1)  | 1.8395 | P(3)-O(3)  | 1.6106 |
| Mg(2)-O(2)  | 1.8364 | P(3)-O(2)  | 1.7145 |

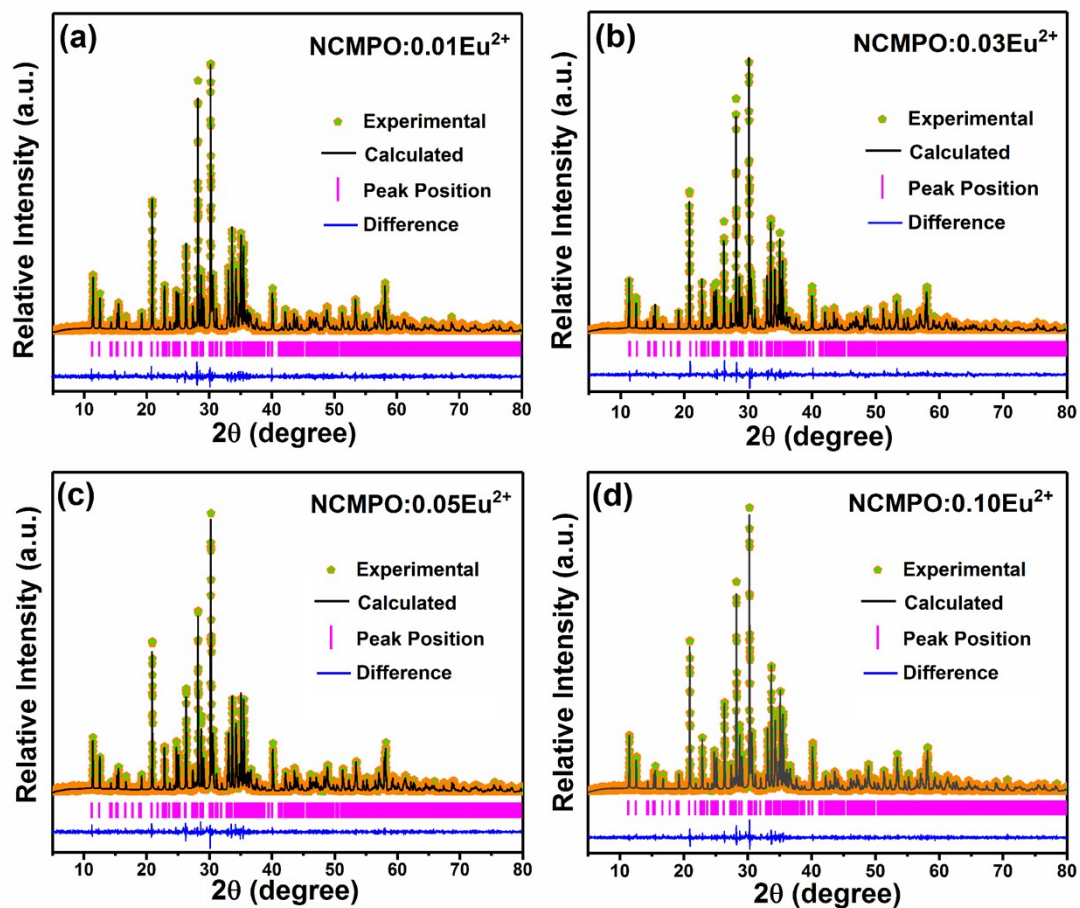

Figure. S1 the Rietveld refinement XRD pattern of NCMPO:  $x\text{Eu}^{2+}$  ( $x=0.01, 0.03, 0.05, 0.10$ )

**Table S3 The crystallographic data of NCMPO:0.01Eu<sup>2+</sup> by Rietveld refinement**

|                            |                                                                                                                             |
|----------------------------|-----------------------------------------------------------------------------------------------------------------------------|
| <b>Formula</b>             | Na <sub>3</sub> Cs <sub>0.99</sub> Eu <sub>0.01</sub> Mg <sub>6.99</sub> Li <sub>0.01</sub> (PO <sub>4</sub> ) <sub>6</sub> |
| <b>Crystal system</b>      | monoclinic                                                                                                                  |
| <b>Space group</b>         | C 1 2/c 1 (15)                                                                                                              |
| <b>Cell parameters (Å)</b> | a=12.7322(2) b= 10.7006(1) c= 15.5281(2)                                                                                    |
| <b>Cell ratio</b>          | b/c=0.6891 c/a=1.2196 a/b=1.1899                                                                                            |
| <b>Cell volume</b>         | 1947.13(4) Å <sup>3</sup>                                                                                                   |
| <b>Calculated density</b>  | 3.37397 g/cm <sup>3</sup>                                                                                                   |
| <b>Z</b>                   | 4                                                                                                                           |
| <b>Reliability factors</b> | R <sub>wp</sub> =9.64% R <sub>p</sub> =7.59% χ <sup>2</sup> = 1.203                                                         |

**Table S4 The crystallographic data of NCMPO: 0.03Eu<sup>2+</sup> by Rietveld refinement**

|                            |                                                                                                                             |
|----------------------------|-----------------------------------------------------------------------------------------------------------------------------|
| <b>Formula</b>             | Na <sub>3</sub> Cs <sub>0.97</sub> Eu <sub>0.03</sub> Mg <sub>6.97</sub> Li <sub>0.03</sub> (PO <sub>4</sub> ) <sub>6</sub> |
| <b>Crystal system</b>      | monoclinic                                                                                                                  |
| <b>Space group</b>         | C 1 2/c 1 (15)                                                                                                              |
| <b>Cell parameters (Å)</b> | a=12.7263(2) b= 10.6969(1) c= 15.5196(2)                                                                                    |
| <b>Cell ratio</b>          | b/c=0.6893 c/a=1.2195 a/b=1.1897                                                                                            |
| <b>Cell volume</b>         | 1945.43(4) Å <sup>3</sup>                                                                                                   |
| <b>Calculated density</b>  | 3.37893 g/cm <sup>3</sup>                                                                                                   |
| <b>Z</b>                   | 4                                                                                                                           |
| <b>Reliability factors</b> | R <sub>wp</sub> =10.09% R <sub>p</sub> =7.58% χ <sup>2</sup> = 1.164                                                        |

**Table S5 The crystallographic data of NCMPO: 0.05Eu<sup>2+</sup> by Rietveld refinement**

|                            |                                                                                                                             |
|----------------------------|-----------------------------------------------------------------------------------------------------------------------------|
| <b>Formula</b>             | Na <sub>3</sub> Cs <sub>0.95</sub> Eu <sub>0.05</sub> Mg <sub>6.95</sub> Li <sub>0.05</sub> (PO <sub>4</sub> ) <sub>6</sub> |
| <b>Crystal system</b>      | monoclinic                                                                                                                  |
| <b>Space group</b>         | C 1 2/c 1 (15)                                                                                                              |
| <b>Cell parameters (Å)</b> | a=12.7252(2) b= 10.6967 (1) c= 15.5193(2)                                                                                   |
| <b>Cell ratio</b>          | b/c=0.6893 c/a=1.2196 a/b=1.1896                                                                                            |
| <b>Cell volume</b>         | 1943.67(4) Å <sup>3</sup>                                                                                                   |
| <b>Calculated density</b>  | 3.38022 g/cm <sup>3</sup>                                                                                                   |
| <b>Z</b>                   | 4                                                                                                                           |
| <b>Reliability factors</b> | R <sub>wp</sub> =10.19% R <sub>p</sub> =8.03% χ <sup>2</sup> = 1.267                                                        |

**Table S6 The crystallographic data of NCMPO: 0.10Eu<sup>2+</sup> by Rietveld refinement**

|                            |                                                                                                                             |
|----------------------------|-----------------------------------------------------------------------------------------------------------------------------|
| <b>Formula</b>             | Na <sub>3</sub> Cs <sub>0.90</sub> Eu <sub>0.10</sub> Mg <sub>6.90</sub> Li <sub>0.10</sub> (PO <sub>4</sub> ) <sub>6</sub> |
| <b>Crystal system</b>      | monoclinic                                                                                                                  |
| <b>Space group</b>         | C 1 2/c 1 (15)                                                                                                              |
| <b>Cell parameters (Å)</b> | a=12.7233(2) b= 10.6900 (1) c= 15.5151(2)                                                                                   |
| <b>Cell ratio</b>          | b/c=0.6890 c/a=1.2194 a/b=1.1902                                                                                            |
| <b>Cell volume</b>         | 1942.53(4) Å <sup>3</sup>                                                                                                   |
| <b>Calculated density</b>  | 3.38062 g/cm <sup>3</sup>                                                                                                   |
| <b>Z</b>                   | 4                                                                                                                           |
| <b>Reliability factors</b> | R <sub>wp</sub> =9.97% R <sub>p</sub> =8.13% χ <sup>2</sup> = 1.294                                                         |

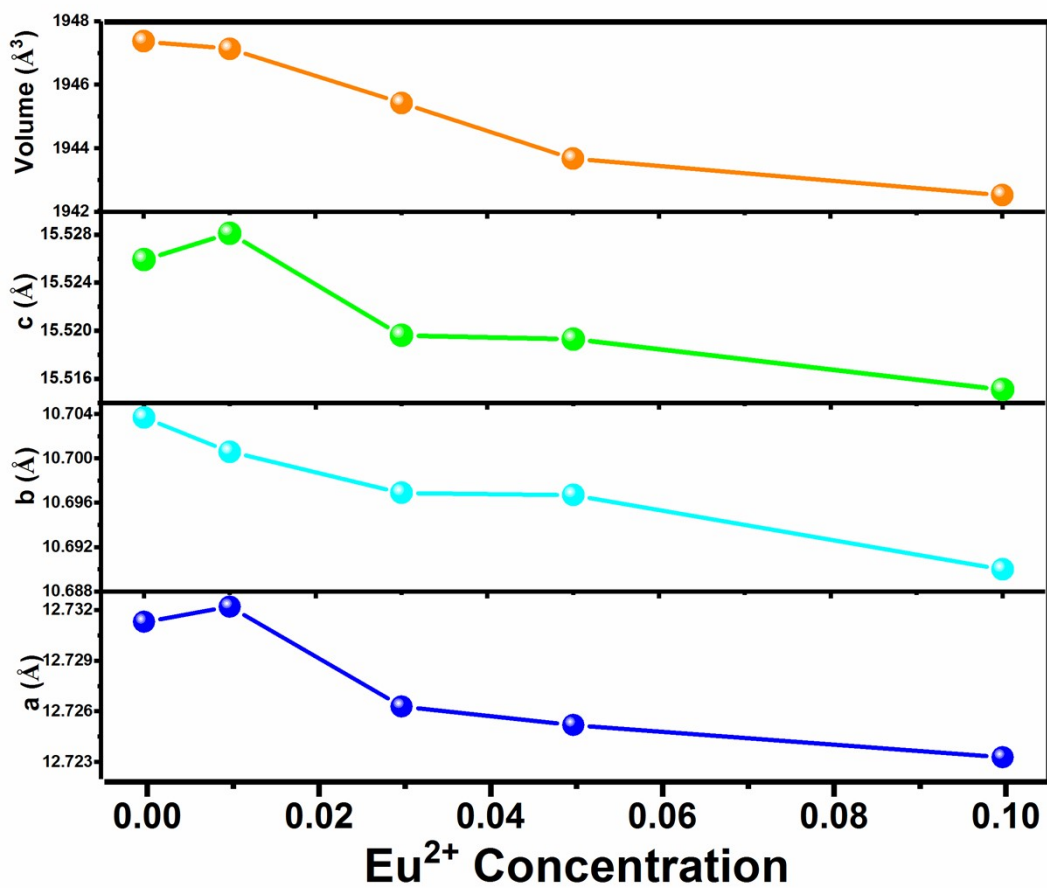**Figure. S2** The change of the cell parameters with different Eu<sup>2+</sup> concentration

Table. S7 The data on EDX of the samples

| Atom<br>Samples | Na   | Cs   | Mg   | P | Eu   |
|-----------------|------|------|------|---|------|
| 0               | 3.09 | 1.00 | 6.91 | 6 | 0    |
| 0.01            | 3.02 | 0.99 | 6.98 | 6 | 0.01 |
| 0.02            | 2.99 | 0.98 | 6.96 | 6 | 0.02 |
| 0.03            | 3.01 | 0.97 | 6.95 | 6 | 0.03 |
| 0.04            | 3.00 | 0.96 | 6.95 | 6 | 0.04 |
| 0.05            | 3.01 | 0.95 | 6.94 | 6 | 0.05 |
| 0.07            | 2.97 | 0.93 | 6.93 | 6 | 0.07 |
| 0.10            | 3.01 | 0.90 | 6.90 | 6 | 0.10 |

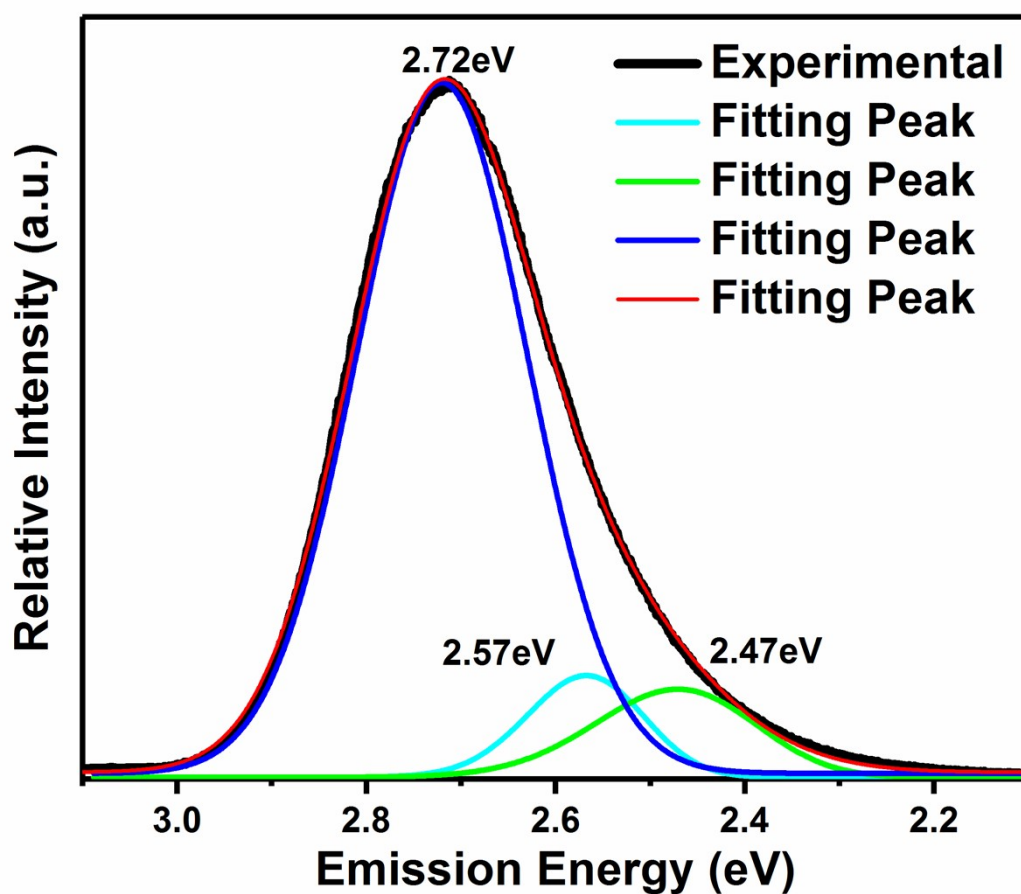

Figure. S3 The emission spectrum with Gaussian fitting

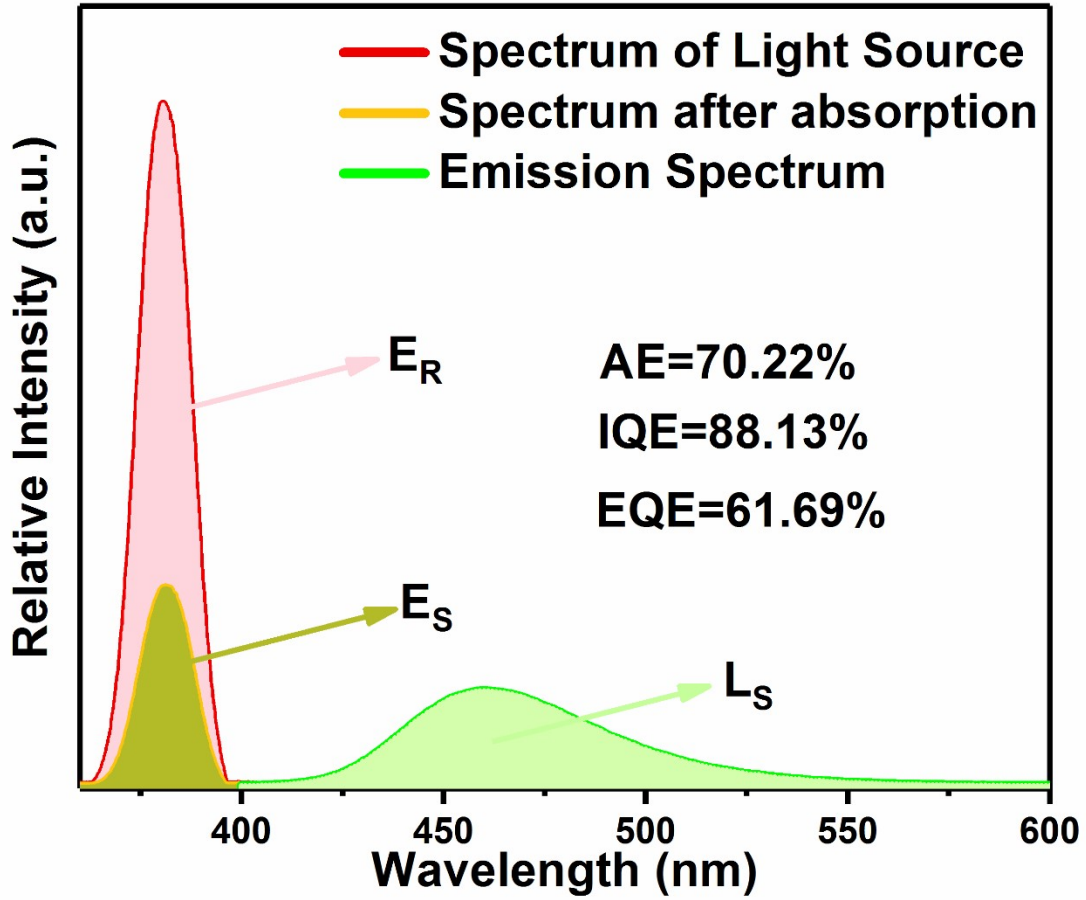

**Figure. S4** The spectra of light source and NCMPO: 0.03Eu<sup>2+</sup> collected by using an integrating sphere

The absorption efficiency (AE), internal quantum efficiency (IQE) and external quantum efficiency (EQE) can be calculated by using the following equations:

$$AE = \frac{\int E_R - \int E_S}{\int E_R}$$

$$IQE = \frac{\int L_S}{\int E_R - \int E_S}$$

$$EQE = AE \times IQE = \frac{\int L_S}{\int E_R}$$

in which  $E_S$  stands for the spectrum of light used for exciting the phosphor,  $L_S$

represents the emission spectrum of the phosphor, and  $E_R$  is the spectrum of excitation light without phosphor in sphere.)
